# Supplementary material
Source: PubMed Central journal article supplement (PMC4319631)
Supplement: supp_the2014-0325_Supplemental_Figure.pdf [file supp_the2014-0325_Supplemental_Figure.pdf]

Supplemental Figure for:  
Genomic classifier (ColoPrint) predicts recurrence of stage II colorectal cancer patients more accurately than clinical factors  
Scott Kopetz et al.

**Figure S1** : Relapse-free survival for patients with rectal cancer by ColoPrint signatures.

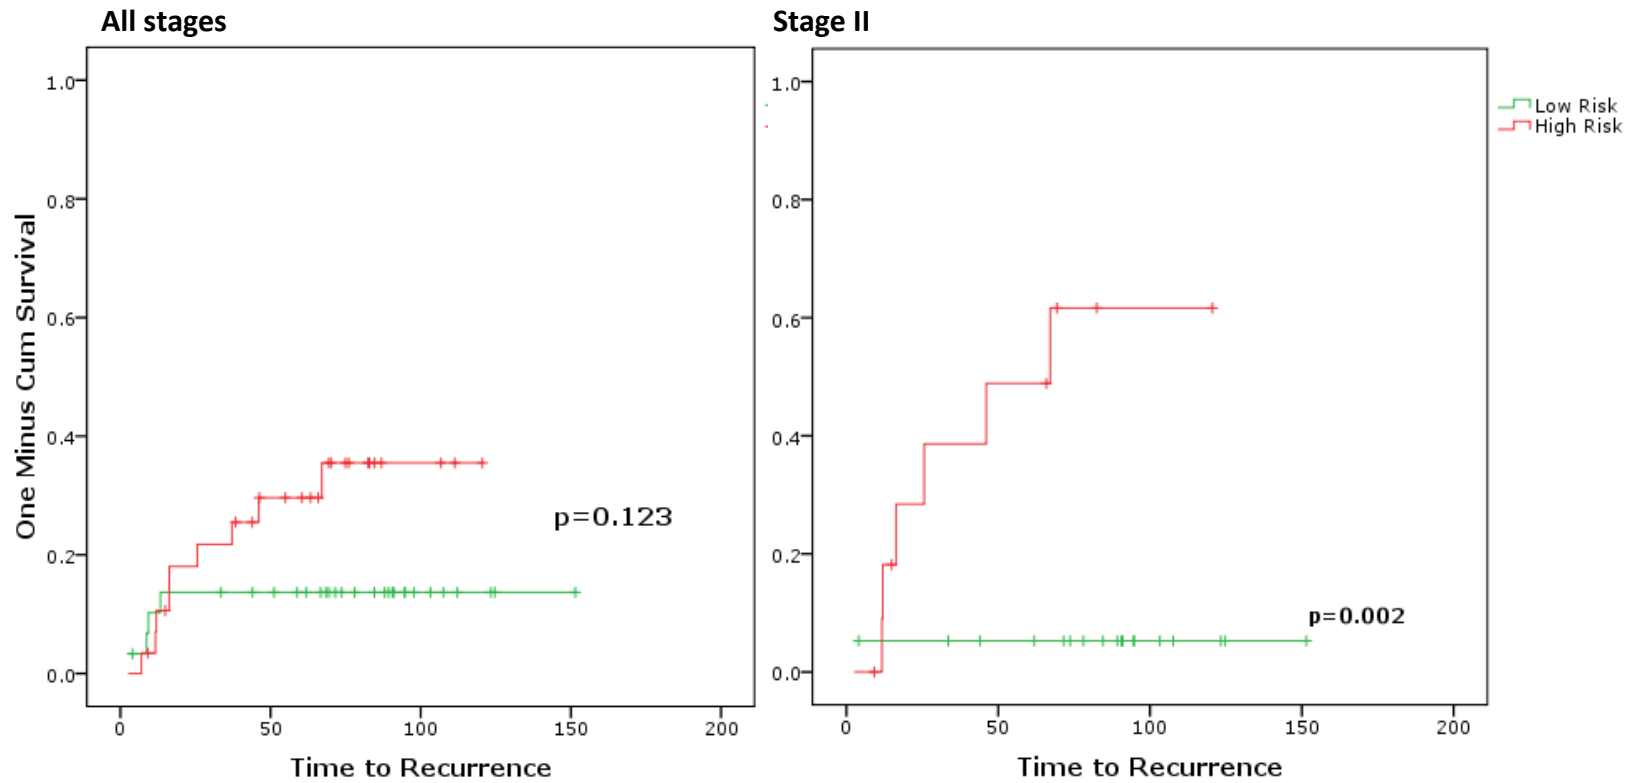

Supplemental Figure for:  
Genomic classifier (ColoPrint) predicts recurrence of stage II colorectal cancer patients more accurately than clinical factors  
Scott Kopetz et al.
