# Supplementary material
Source: PubMed Central journal article supplement (PMC4319631)
Supplement: supp_the2014-0325_Supplemental_Table.pdf [file supp_the2014-0325_Supplemental_Table.pdf]

Supplemental Table for:  
Genomic classifier (ColoPrint) predicts recurrence of stage II colorectal cancer patients more accurately than clinical factors  
Scott Kopetz et al.

Table S1. Patient information by hospital.

| Variable           | Total     |     | ICO   |       | Munich |       | VHB  |       | Ferrara |      | MDA  |       | p-value      |                  |
|--------------------|-----------|-----|-------|-------|--------|-------|------|-------|---------|------|------|-------|--------------|------------------|
|                    | N=416     | %   | n=115 | 27.6% | n=135  | 32.5% | n=50 | 12.0% | n=20    | 4.8% | n=96 | 23.1% |              |                  |
| Median Age         | 67.0      |     | 69.0  |       | 65.0   |       | 75.5 |       | 70.0    |      | 65.1 |       | <b>0.004</b> |                  |
| Age > 65           | No        | 171 | 41.1  | 39    | 33.9   | 66    | 48.9 | 14    | 28.0    | 4    | 20.0 | 48    | 50.0         | <b>0.003</b>     |
|                    | Yes       | 245 | 58.9  | 76    | 66.1   | 69    | 51.1 | 36    | 72.0    | 16   | 80.0 | 48    | 50.0         |                  |
| Localization       | L         | 206 | 49.5  | 60    | 52.2   | 78    | 57.8 | 22    | 44.0    | 6    | 30.0 | 40    | 41.7         | <b>0.002</b>     |
|                    | R         | 179 | 73.0  | 41    | 35.7   | 57    | 42.2 | 22    | 44.0    | 11   | 55.0 | 48    | 50.0         |                  |
|                    | RE        | 31  | 7.5   | 14    | 12.2   | 0     | 0.0  | 6     | 12.0    | 3    | 15.0 | 8     | 8.3          |                  |
| Grade              | 1         | 80  | 19.2  | 69    | 60.0   | 1     | 0.7  | 7     | 14.0    | 1    | 5.0  | 2     | 2.1          | <b>&lt;0.001</b> |
|                    | 2         | 273 | 65.6  | 42    | 36.5   | 93    | 68.9 | 34    | 68.0    | 18   | 90.0 | 86    | 89.6         |                  |
|                    | 3         | 63  | 15.1  | 4     | 3.5    | 42    | 30.4 | 9     | 18.0    | 1    | 5.0  | 8     | 8.3          |                  |
| Gender             | M         | 243 | 58.4  | 72    | 62.6   | 77    | 57.0 | 25    | 50.0    | 12   | 60.0 | 57    | 59.4         | <b>0.653</b>     |
|                    | F         | 173 | 41.6  | 43    | 37.4   | 58    | 43.0 | 35    | 50.0    | 8    | 40.0 | 39    | 40.6         |                  |
| Median LN assessed | 19.0      |     | 18.0  |       | 20.0   |       | 16.0 |       | 15.5    |      | 20.5 |       | <b>0.006</b> |                  |
| LN > 12            | No        | 85  | 20.4  | 31    | 27.0   | 14    | 10.4 | 18    | 36.0    | 7    | 35.0 | 15    | 15.6         | <b>&lt;0.001</b> |
|                    | Yes       | 331 | 79.6  | 84    | 73.0   | 121   | 89.6 | 32    | 64.0    | 13   | 65.0 | 81    | 84.4         |                  |
| pT                 | 3         | 368 | 88.5  | 104   | 90.4   | 115   | 85.2 | 47    | 94.0    | 17   | 85.0 | 85    | 88.5         | <b>0.463</b>     |
|                    | 4         | 48  | 11.5  | 11    | 9.6    | 20    | 14.8 | 3     | 6.0     | 3    | 15.0 | 11    | 11.5         |                  |
| Therapy            | No        | 292 | 70.2  | 74    | 64.3   | 128   | 94.8 | 18    | 36.0    | 11   | 55.0 | 61    | 63.5         | <b>&lt;0.001</b> |
|                    | Yes       | 124 | 29.8  | 41    | 35.7   | 7     | 5.2  | 32    | 64.0    | 9    | 45.0 | 35    | 36.5         |                  |
| MSI status         | MSS       | 336 | 80.8  | 102   | 88.7   | 102   | 75.6 | 38    | 76.0    | 17   | 85.0 | 77    | 80.2         | <b>0.092</b>     |
|                    | MSI       | 80  | 19.2  | 13    | 11.3   | 33    | 24.4 | 12    | 24.0    | 3    | 15.0 | 19    | 19.8         |                  |
| NCCN               | Low Risk  | 236 | 56.7  | 73    | 63.5   | 84    | 62.2 | 31    | 62.0    | 8    | 40.0 | 40    | 41.7         | <b>0.004</b>     |
|                    | High Risk | 180 | 43.3  | 42    | 36.5   | 51    | 37.8 | 19    | 38.0    | 12   | 60.0 | 56    | 58.3         |                  |

ICO: Institut Català d'Oncologia. Barcelona, Spain; Munich: Klinikum Rechts der Isar, Technische University, Munich, Germany; VHB: Vall D'Hebron Hospital. Barcelona, Spain; Ferrara: University of Ferrara, Ferrara, Italy; MDA: University of Texas, MD Anderson Cancer Center. Houston, TX;
